# Supplementary material for: Analysis of Dynamic Characteristics of Ring Squeeze Film Damper-Rotor System
Source: Research Square preprint supplement (doi:10.21203/rs.3.rs-966661/v1), 2021-10-25
Supplement: Supplementary file 1 [file a913910fee1c15510a16e7e9.docx]

**Highlights**

- This paper revealed the vibration reduction mechanism of the ring squeeze film damper.
- The law of oil film pressure, bearing capacity, and deflection angle with eccentricity and the width-to-diameter ratio is analyzed.
- The oil film whirl mechanism of the ring squeeze film damper is revealed according to the analysis of the transient characteristics.
- The fluid-structure coupling method is used to analyze the influence of oil filling on the dynamic characteristics of the elastic ring.
